1 **Main Manuscript for**

2 A reduced level of consciousness affects non-conscious processes

3 **Authors:**

4 A. Fontan<sup>1\*</sup>, L. Lindgren<sup>2</sup>, T. Pedale<sup>1</sup>, C. Brorsson<sup>3</sup>, F. Bergström<sup>4</sup>, J. Eriksson<sup>1</sup>

5 **Affiliations:**

6 <sup>1</sup>Department of Integrative medical biology, Umeå Center for Functional Brain Imaging, Umeå  
7 University, Sweden.

8 <sup>2</sup>Department of Nursing, Umeå University, Umeå, Sweden.

9 <sup>3</sup>Department of Anaesthesia and Intensive Care, Institution of Surgery and Perioperative Sciences,  
10 Umeå University, Sweden.

11 <sup>4</sup>Faculty of Psychology and Educational Sciences, University of Coimbra, Portugal.

12 \* corresponding author: Aurelie Fontan

13

14

15 **This PDF file includes:**

16 **Main Text**

17 **Figures 1 to 2**

18 **Supplementary figures 1 to 4**

19

20

21

22

23

24        **Abstract**

25        Being conscious is a profound aspect of human existence, and understanding its function and its  
26        inception is considered one of the truly grand scientific challenges. However, the nature of  
27        consciousness remains enigmatic, to a large part because “being conscious” can refer to both the  
28        content (phenomenology) and the level (arousal) of consciousness, and how these different aspects  
29        are related remains unclear. To empirically assess the relation between level and content of  
30        consciousness, we manipulated these two aspects by presenting stimuli consciously or non-  
31        consciously and by using Propofol sedation, while brain activity was measured using fMRI. We  
32        observed that sedation greatly affected non-conscious processes, which starkly contrasts the notion  
33        that anesthetics selectively reduce consciousness. Our findings reveal that level and content of  
34        consciousness are separate phenomena, and imply that one may need to reconsider what “being  
35        conscious” means.

36

37

38

39

40

41

42

43

44

45

46

47 **Main Text**

48

49 **Introduction**

50 The concept of consciousness is multifaceted and can refer to at least two aspects: the  
51 content and the level/state of consciousness. The “content” relates to the core characteristic of  
52 consciousness, which is the subjective, phenomenal, “what-it-is-like” quality associated with  
53 experiencing something (Nagel, 1974). The level of consciousness commonly refers to  
54 arousal/wakefulness, and occurs on a continuum e.g., from comatose to fully awake (Laureys,  
55 2005). These two aspects have mostly been investigated separately and there is much debate on  
56 how to conceptualize their relation (Bachmann, 2012; Bayne et al., 2016; Fazekas and Overgaard,  
57 2016; Hohwy, 2009; Koch et al., 2016; Laureys, 2005; Overgaard et al., 2006).

58 On one hand, they can be considered as two aspects of the same underlying phenomenon  
59 (Aru et al., 2020; Bachmann and Hudetz, 2014; Mashour and Hudetz, 2017; Phillips et al., 2018;  
60 Suzuki and Larkum, 2020), which is supported by the observation that a certain level of arousal is  
61 required to enable conscious experiences. Indeed, we have a rich repertoire of conscious  
62 experiences when we are awake, and these experiences end during dreamless sleep or when we  
63 otherwise “lose” consciousness (Searle, 2000). In addition, brain research has demonstrated that  
64 the level of arousal affects integration of information across multiple brain regions (Casali et  
65 al., 2013), which may be key for generating conscious experiences (Tononi et al., 2016).  
66 Moreover, it has been suggested that neural mechanisms related to changes in the level of arousal  
67 overlap with the mechanisms generating conscious experiences (Aru et al., 2019), and general  
68 anesthesia is commonly considered to “selectively reduce consciousness”. Yet, while general  
69 anesthesia, sleep, or coma, are commonly described as states altering consciousness, the extent to

70 which conscious experiences are lost/reduced when we are unresponsive is difficult to establish  
71 (Aru et al., 2020; Alkire et al., 2018; Bayne 2019).

72 On the other hand, the content and level/state of consciousness may be seen as separate  
73 phenomena (e.g., Bayne et al., 2016). A distinction between the two is apparent in every-day and  
74 clinical situations, which suggests instead that the level and the content of consciousness are not  
75 specifically interrelated. For example, vegetative-state patients can display sleep-wake cycles but  
76 remain unresponsive to external stimuli (Wisłowska et al., 2017), and on rare occasions fully  
77 anesthetized patients can have conscious experiences (Errando et al., 2008). Moreover, we process  
78 information both consciously and non-consciously when we are awake (Kihlstrom, 1987).

79 To understand how level (hereafter referred to as “arousal”) and content (hereafter referred  
80 to as “conscious perception”) of consciousness are related, we set out to empirically assess their  
81 relation by manipulating both aspects while brain activity was measured using fMRI. Arousal was  
82 manipulated by administering two levels of the sedative Propofol. Importantly, participants were  
83 only mildly sedated and able to report whether they consciously perceived stimuli or not and to  
84 perform tasks during both sedation levels. Within each sedation level, the content of consciousness  
85 was manipulated by presenting visuospatial stimuli both consciously and non-consciously. Two  
86 possible outcomes may be expected. If reduced arousal selectively reduces processing of  
87 consciously perceived stimuli, the neural processes related to conscious perception would be  
88 uniquely affected by a change in arousal compared to non-conscious perception. Alternatively,  
89 neural processes would be affected by a change in arousal regardless of whether stimuli are  
90 consciously perceived or not.

91

92

93 **Results**

94 This study included 30 healthy individuals who during fMRI performed a simple visuospatial  
95 main task under two levels of Propofol sedation: low (0.1 mg/h/kg; hereafter labelled “LS” for  
96 “low sedation”) and moderate sedation (“MS”). The visuospatial task was divided in blocks  
97 performed twice for each sedation level. A stabilization period (~6 min) was implemented between  
98 each block to allow the effect of Propofol to reach its steady state, during which participants  
99 performed a simple visuo-motor “metronome” task, consisting of timing their motor responses as  
100 synchronous as possible to a gray disc presented in one quadrant of the display. The main task,  
101 performed during stable periods of Propofol infusion, consisted of noting the location of a gray  
102 disc presented in one of the display’s quadrants. There were three presentation conditions: a  
103 conscious, a non-conscious, and an “absent” condition. Conscious/non-conscious perception was  
104 manipulated with continuous flash suppression (Tsuchiya and Koch, 2005) (Supplementary Fig.1).  
105 After each trial, participants evaluated their visual experience of the disc on a three-point  
106 “perceptual awareness scale” (PAS; see Methods).

107

108 *Sedation effect on behavior*

109 First, to ensure that participants’ arousal was affected by Propofol sedation, we verified that  
110 the response variability relative to the metronome response cue (i.e., how precisely participants  
111 paced the responses; Supplementary Fig.2A) increased for MS. Among the three stabilization  
112 periods, we observed that participants’ performance changed as a function of the Propofol level  
113 ( $F_{2,58} = 12.1$ ;  $p = 0.0004$ ). Indeed, variability increased with the change of sedation from LS to MS  
114 and decreased from MS to LS (Supplementary Fig.2B). This confirmed that participants’ arousal  
115 changed before each block of the main task.

116 During the main visuospatial task, comparison of PAS responses between the sedation levels  
117 revealed a significant interaction effect in conscious ( $F_{2,58} = 5.2$ ,  $p = 0.009$ ) and in non-conscious  
118 ( $F_{2,58} = 8.5$ ,  $p = 0.0006$ ) conditions. Specifically, the number of stimuli reported as unseen (PAS =  
119 1) increased for MS relative to LS (Newman-Keuls test:  $p = 0.04$  and  $p = 0.01$  for conscious and  
120 non-conscious trials respectively), with a concomitant decrease of clear (PAS = 3) visual  
121 experiences in conscious ( $p = 0.02$ ) and of vague (PAS = 2) visual experiences in non-conscious  
122 ( $p = 0.003$ ) conditions. To ensure no conscious visual experience in non-conscious trials and clear  
123 perception in conscious trials, only trials with PAS = 1 in non-conscious and in absent conditions,  
124 and trials with PAS = 3 in conscious condition, were included (> 80% of trials in each condition  
125 for the two sedation levels; see Methods) in the following analyses.

126 For conscious trials, participants had near perfect accuracy (hits – false alarms; mean  $\pm$  SD:  
127 LS =  $0.99 \pm 0.02$ ; MS =  $0.99 \pm 0.04$ ; Fig.1A), with no difference between sedation levels  
128 (Wilcoxon match pairs test:  $z = 0.27$ ,  $p = 0.79$ ). For non-conscious trials, accuracy was at chance  
129 level (mean  $\pm$  SD: LS =  $0.01 \pm 0.12$ ,  $t_{30} = 0.59$ ;  $p = 0.56$ ; MS =  $0.006 \pm 0.12$ ;  $t_{30} = 0.25$ ;  $p = 0.80$ ;  
130 Fig.1A), again with no difference between sedation levels (Wilcoxon match pairs test:  $z = 0.20$ ,  $p$   
131 =  $0.84$ ). As such, these stimuli were non-conscious according to both subjective and objective  
132 criteria. Participants' response time did not differ between non-conscious and absent trials for  
133 either sedation level (LS:  $t_{29} = -0.70$ ,  $p = 0.5$ ; MS:  $t_{29} = -0.32$ ,  $p = 0.7$ ), but was generally slower  
134 during MS compared to LS (main effect of sedation:  $F_{1,29} = 13.42$ ;  $p = 0.0006$ ; Fig.1B).

135  
136 xxxxxxxxxxxx Figure 1 xxxxxxxxxxxx

137

138

139 *Neural response to stimulus presence*

140 We then investigated the neural response related to both conscious and non-conscious  
141 visuospatial processing. Whole-brain univariate analyses of fMRI data, contrasting conscious to  
142 absent conditions, revealed significant blood-oxygen-level-dependent (BOLD) signal change in  
143 brain areas consistent with visuospatial processing (De Schotten et al., 2005) (Supplementary  
144 Fig.3). However, these analyses were not sensitive enough to reveal any signal change related to  
145 sedation levels, despite changes in participants' response time during the main task and response  
146 variability during the metronome task. Non-conscious processing was not detected either.  
147 Multivariate pattern analysis (MVPA) is more sensitive compared to univariate analyses (Haxby,  
148 2012), and has previously been used to investigate non-conscious processes (Ahrens, 2013;  
149 Bergström and Eriksson, 2018; Sheikh et al., 2019; Soto et al., 2019); it therefore appears better  
150 suited to capture the expectedly subtle BOLD signal changes related to MS and, crucially for the  
151 question at hand, if MS affects conscious and non-conscious processing differently.

152 Using MVPA, we first applied a searchlight approach to generate decoding accuracy maps  
153 of the mere presence of the stimulus for non-conscious trials (i.e., non-conscious vs. absent trials,  
154 irrespective of sedation level) for each individual separately. This searchlight decoding was  
155 restricted to brain areas previously shown to be involved in visuospatial perception (Wang et al.,  
156 2015) and were thresholded at 50% decoding accuracy. Corresponding maps for conscious vs.  
157 absent trials were also generated. Maps derived from both non-conscious and conscious trials  
158 included bilateral early visual cortex, intraparietal sulcus, and frontal eye fields (Fig.2A), and were  
159 used to define regions of interest (ROIs) to quantify the effect of sedation on conscious and non-  
160 conscious perceptual processing. To ensure that regional differences would not confound any  
161 differences detected between the sedation effects on conscious and non-conscious processing, the

162 ROIs were defined as the overlap between the decoding maps for conscious and non-conscious  
163 trials (Fig.2A).

164

### 165 *Sedation effect on neural patterns*

166 We then used a ROI-based MVPA to decode the difference between LS and MS for conscious and  
167 non-conscious trials separately. In addition, we used a contrast approach on a trial-by-trial basis  
168 for the MVPA classification to control for possible non-specific effects of visuospatial processing.  
169 Thus, the BOLD signal from the absent condition was subtracted from conscious and non-  
170 conscious BOLD signal, separately for each sedation level (i.e., ConscLS-AbsLS vs ConscMS-  
171 AbsMS, NonconscLS-AbsLS vs NonconscMS-AbsMS; see Materials and Methods for more  
172 details). Possible non-specific changes in cerebral blood flow were also quantified using arterial  
173 spin labeling and no significant difference between LS and MS was observed (see Methods).

174 Decoding accuracies for the sedation effect on conscious processing ( $65.0 \pm 10.2\%$ ) and  
175 on non-conscious processing ( $60.8 \pm 8.5\%$ ) were significantly different from chance (permutation  
176 test (Stelzer et al., 2013):  $p = 0$ ; i.e., all 10000 permutations had a value below 65.0 and 60.8%,  
177 respectively), revealing that the sedation affected both conscious and non-conscious processes.  
178 Moreover, we observed a significant difference between conscious and non-conscious decoding  
179 accuracies (Wilcoxon matched pairs test:  $z = 4.63$ ;  $p = 3.5 \times 10^{-6}$ ), revealing an interaction between  
180 arousal and conscious/non-conscious visuospatial processing, thereby demonstrating that a change  
181 in the arousal affects conscious and non-conscious processes differently.

182 This higher decoding accuracy for the sedation effect on conscious processing compared to non-  
183 conscious processing would thus indicate that arousal does indeed primarily affects conscious  
184 processing. Crucially, these results are based on BOLD signal changes where a common reference



185 condition (absent trials) had been subtracted. While controlling for non-specific effects from  
186 Propofol sedation, this subtraction procedure does not isolate conscious processing from non-  
187 conscious processing. Arguably, BOLD signal for conscious trials should therefore partly reflect  
188 the non-conscious processes that precede and lead to conscious perception of the target stimulus,  
189 in addition to conscious processes. To ensure that non-conscious processes did not drive the  
190 decoding of sedation levels in the conscious condition, we performed a further analysis where non-  
191 conscious BOLD signal was subtracted from conscious BOLD signal, separately for each sedation  
192 level (i.e., ConscLS-NonsconscLS vs ConscMS-NonconscMS, see Materials and Methods for  
193 details) . Surprisingly, while the decoding accuracy of the sedation level for conscious processing  
194 ( $54.8 \pm 7.3\%$ ) was significantly different from chance (permutation test:  $p = 0.001$ ), it was also  
195 significantly lower than the decoding accuracy of the sedation effects on non-conscious processing  
196 (Wilcoxon matched pairs test:  $z = 2.9$ ;  $p = 0.0032$ ), revealing that arousal affected non-conscious  
197 processes even more than it affected conscious processes (Fig.2B). These results were replicated  
198 in supplemental analyses using alternative ROIs based on the metronome task performed during  
199 the stabilization periods, which, similar to the main task, requires visuospatial processing (see  
200 Supplementary Fig.5).

201

202 xxxxxxxxxxxx Figure 2 xxxxxxxxxxxx

203

## 204 **Discussion**

205 The finding that a reduced level of arousal greatly affects non-conscious processes has  
206 several implications for the concept of consciousness and for clinical situations. Firstly, it could  
207 be argued that the conception of “levels of consciousness” when referring to arousal is a

208 misnomer. While our results do show that conscious processes are affected by a reduced level  
209 of arousal, even greater changes were evident for non-conscious processes. Thus, to denote a  
210 reduced level of arousal as an altered level (or state) of consciousness is potentially misleading,  
211 because such terminology suggests a specificity that apparently is non-existent. It may be more  
212 appropriate to simply use “arousal”, “alertness”, or similar terminology, because a change in  
213 arousal affects both conscious and non-conscious processing, which together constitute the  
214 individual’s mental capacity. Our findings are consistent with theories of consciousness that  
215 explicitly separate levels and content (e.g., Northoff and Huang, 2017), but are problematic for  
216 hypotheses that suggest integrating these two dimensions as subtending consciousness (e.g.,  
217 Aru et al., 2019; Bachmann and Hudetz, 2014).

218         Secondly, our findings have implications for the development of “consciousness markers”  
219 in people with low levels of arousal and/or altered “states of (un)consciousness”. One great  
220 challenge in consciousness research, which has substantial ethical implications, is to know  
221 whether patients that are non-responsive due to anesthesia or trauma retain their capacity for  
222 conscious experiences. One candidate marker, suggested to reflect conscious experience (i.e.,  
223 content consciousness), is the perturbational complexity index (PCI), which reliably discriminate  
224 between lower “levels of consciousness”, including sleep, anesthesia, and in patients with  
225 consciousness disorders (Casali et al., 2013; Sarasso et al., 2015). To our knowledge, the PCI and  
226 other candidate markers do not take changes in non-conscious processing into account. While the  
227 sedation-related changes observed in conscious processes are consistent with the idea of reduced  
228 integration (Schrouff et al., 2011), we have here shown that changes in non-conscious processing  
229 were substantial. Again, the lack of specificity, i.e., the inability to isolate processing specifically  
230 related to (the content of) consciousness and to exclude effects emanating from changes in non-

231 conscious processing, is problematic for existing markers of consciousness. The same goes for  
232 research on the neural correlates of consciousness where manipulations of arousal are used  
233 (Eriksson et al., 2020; Koch et al., 2016). That is, given our current findings, changes in  
234 markers/indices or correlates are likely to have been driven by non-conscious in addition to  
235 conscious processes. For practical purposes, e.g., when trying to determine if a patient is capable  
236 of conscious experiences or not, a correlation between general mental capacity and the capacity  
237 for conscious experiences may suffice, but should be verified.

238 Previous neuroimaging research on the effects of sedation has demonstrated a sparing of  
239 neural activity in sensory regions combined with a reduction in higher-order regions, including  
240 frontal and parietal cortex (e.g., Demertzi et al., 2019; Hudetz and Mashour, 2016). Such previous  
241 findings are consistent with the notion that sedation primarily affects conscious perceptual  
242 processing, but are not necessary inconsistent with our current findings. Indeed, while the current  
243 study is the first to manipulate both arousal and conscious perception simultaneously, we have  
244 only used two levels of sedation. It therefore remains unknown whether the relation is linear or  
245 non-linear. In addition, the smaller impact of the MS on conscious processes, and that is also  
246 consistent with participants' accuracy in this condition, could result from some form of attentional  
247 effect that acts differently on conscious vs. non-conscious stimuli (Coull et al., 2004). Further  
248 characterization of the effects of alertness on conscious and non-conscious processing is an  
249 important task for future research, together with investigations of how the current findings  
250 generalize to other stimuli, tasks, and manipulations of alertness.

251 In conclusion, our current results show that Propofol greatly alters non-conscious processes  
252 and to a lesser extent conscious processes, contrary to the notion that anesthetics selectively reduce  
253 “consciousness”. This finding implies that one may need to reconsider what it means to “be

254 conscious”, and could lead to improved markers of consciousness and to a better understanding of  
255 situations where content and level dissociate, for example when sedated patients retain the capacity  
256 for conscious experiences.

257

## 258 **Materials and Methods**

259

### 260 *Participants*

261 Forty healthy right-handed adults took part in the experiment. Participants were recruited from  
262 Umeå University campus through poster and internet advertisements. They had normal or  
263 corrected-to-normal vision, right-eye dominance, gave their written informed consent, and  
264 received financial compensation for participation (600 SEK). Ten participants were excluded from  
265 the analyses, either due to excessive head movement during fMRI scanning ( $n = 5$ ), for failing to  
266 follow task instructions ( $n = 4$ ), or because non-conscious processing could not be verified ( $n = 1$ ).  
267 Thus, the final sample in the analyses was 30 individuals (mean age  $\pm$  SD:  $27.4 \pm 4.6$  years; 12  
268 males). This study was approved by the regional ethics review board (dnr 2018-314-32M).

269

### 270 *Paradigm and stimuli*

271 During fMRI scanning, participants performed a visuospatial task, under continuous flash  
272 suppression (CFS), composed of 120 trials equally distributed in 2 blocks and divided into 3  
273 presentation conditions: 40 conscious, 60 non-conscious, and 20 absent trials for each sedation  
274 level. Each trial was randomly chosen from one of the three conditions.

275 For CFS, a mirror stereoscope was used to isolate visual input from left and right side of  
276 the screen to participants’ corresponding eyes. For non-conscious trials, the target stimulus (gray

277 disc; size =  $0.6^\circ$ ) was presented for 500 ms to the non-dominant (left) eye while colored squares  
278 of random composition (“Mondrians”; size =  $4.2^\circ \times 4.2^\circ$ ) were flashed (10 Hz) to the dominant  
279 eye to suppress conscious experience of the disc (Tsuchiya and Koch, 2005). Mondrians were  
280 flashed for 500 ms longer than the disc’s presentation, minimizing the risk of adaptation after-  
281 effects. To maximize stimulus intensity during non-conscious trials, contrast between the disc and  
282 the gray background was increased or decreased every 10 trials depending on how many times  
283 participant reported the disc as seen. That way, the proportion of actual non-consciously  
284 experienced disc presentations was 80%. There were 17 possible contrast values. The difference  
285 between each contrast consisted of an increase or a decrease in RGB value of 2 (range = 174-206;  
286 background = 210). For conscious trials, the disc (RGB = 198) was superimposed on Mondrians,  
287 presented to the dominant eye, and was thus consciously seen. For “Absent” trials, used as  
288 reference condition, Mondrians were presented to the dominant eye while an empty gray  
289 background ( $4.2^\circ \times 4.2^\circ$ ) was presented to the non-dominant eye.

290 For conscious and non-conscious trials, the disc was presented in one of the four quadrants  
291 of the screen. The position was randomly selected from a pre-specified list where positions were  
292 counterbalanced within each condition. After the disc presentation, a probe was presented, pointing  
293 either to the same spatial location as the disc (match) or to another spatial location (non-match).  
294 Participants had to decide whether the probe was pointing to the disc’s location (yes/no). For non-  
295 conscious and absent trials, participants were instructed to guess on the first alternative that came  
296 to mind. There was 50% chance that the probe pointed to the disc location. After the probe,  
297 participants estimated their conscious experience of the disc on a three-point perceptual awareness  
298 scale (PAS) (Sandberg et al., 2014), from 1: no visual experience to 3: clear visual experience of  
299 the disc. For probe and PAS, participants had to reply within a limit of 2.5 s after which the

300 experiment automatically continued to the next trial. The inter-trial interval (ITI) was adjusted  
301 according to participants' response time in a way that two trials were always separated by 5 s.

302

303 A visual metronome task was also performed and used as a behavioral measure of  
304 participants' arousal. Participants had to synchronize finger taps to visual isochronous metronome  
305 sequences presented to their dominant eye, and were requested not to follow the beat by moving  
306 other body's parts or using covert counting. The stimulus was the same disc as for the visuospatial  
307 task but presented on the gray background with empty dotted circles reflecting the 4 possible  
308 positions of the stimulus apparition. One trial consisted of a 500-ms stimulus presentation followed  
309 by a 500-ms ITI. In total, participants completed 12 sequences of 20 trials (240 visual  
310 presentations) where the stimulus was presented with a 1-Hz tempo. The stimulus' position within  
311 each block was selected in a pseudo-random order in a way that a block mainly consisted (85% of  
312 the trials) of stimuli appearing in one quadrant. Finally, participants received feedbacks about their  
313 performance at the end of each sequence.

314

### 315 ***Propofol sedation: individual adjustment***

316 The anesthetic agent used to manipulate arousal was Propofol (20 mg/ml), which activates  
317 GABA<sub>A</sub> receptors directly (O'Shea et al., 2000). Propofol is considered safe and fast acting  
318 (reaches its steady state ~6 min after infusion) (Trapani et al., 2012), which allowed us to change  
319 the level of arousal several times during fMRI session. Here, two sedation levels were used: a  
320 moderate level that was adjusted individually, and a low level (0.1 mg/kg/h). The choice of having  
321 0.1 mg/kg/h rather than no sedative or saline injection, as a state of comparison was motivated by

322 the fact that the sedative may affect blood flow or other non-neuronal parameters relevant to the  
323 fMRI signal (Qiu et al., 2017).

324 Individual adjustment of the moderate sedation level was evaluated during a pre-scanning  
325 session. Participants fasted from solids for at least 6h and from liquids 4h before sedation. Propofol  
326 was infused through an intravenous catheter placed into a forearm vein. Sedation was achieved  
327 using computer-controlled intravenous infusion of Propofol to obtain constant effect-site  
328 concentrations. Participants were initially injected with 2.0 mg/kg/h of Propofol. The infusion  
329 rate was then increased in steps of 0.25 mg/kg/h, separated by a 6-min stabilization period, until  
330 participants were considered moderately sedated, operationalized as when they showed difficulties  
331 to keep their eyes open, but remained responsive. Physiological parameters such as blood pressure,  
332 pulse oximetry, and breathing frequency were continuously monitored and were stable during  
333 Propofol infusion, and no side effects were observed. Anesthesia administration and monitoring  
334 were based on clinical judgment of the anesthesiologist and the intensive care nurse. In the final  
335 population (n = 30), the range of the moderate sedation was 2.25 to 4.0 mg/kg/h (mean  $\pm$  SD: 2.8  
336  $\pm$  0.5 mg/kg/h).

337

### 338 ***MRI data collection***

339 Propofol infusion started right before participants were placed in the scanner bore.  
340 Participants began the experiment with either the low (“LS”) or the moderate (“MS”) sedation. In  
341 the final sample, 17 participants started with LS and 13 with MS. A certified intensive-care nurse  
342 with specific responsibility for pharmacological administration and monitoring was present  
343 throughout the session, and complete resuscitation equipment was available at all times.

344 The session started with structural imaging (T1, T2 FLAIR and T2 PROPELLER  
345 sequences) so that Propofol levels could stabilize before fMRI scanning. Then, one resting-state  
346 fMRI sequence was run at each sedation level for the use of another study and will not be further  
347 reported here, and task fMRI followed.

348 During task-fMRI, participants performed two 7-min blocks of the visuospatial task under  
349 both sedation levels. Each block was followed by a 6-min stabilization period where sedation level  
350 was changed and during which participants performed the visual metronome task. This resulted in  
351 4 blocks of visuospatial task and 3 stabilization periods. Finally, to verify that Propofol was not  
352 interfering with regional cerebral blood flow (CBF) response at the sedative concentrations  
353 (Veselis et al., 2005), and did not modify flow-metabolism coupling (Johnston et al., 2003), the  
354 MRI session included two pulsed arterial spin-labeling (ASL) sequences for each sedation level.

355 MRI data were collected with a General Electric 3 Tesla Discovery MR750 scanner (32-  
356 channel receive-only head coil). High-resolution T1-weighted structural image was collected  
357 FSPGR with TE = 3.2 ms, TR = 8.2 ms, TI = 450 ms, and flip angle = 12°. Task-fMRI (1410  
358 volumes) was recorded using a T2\*-weighted gradient echo pulse sequence, echo planar  
359 imaging, field of view = 25 cm, matrix size = 96 × 96, slice thickness = 3.4 mm. The volumes  
360 covered the whole cerebrum and most of the cerebellum containing 37 slices with 0.5 mm inter-  
361 slice gap and an ASSET acceleration factor of 2. The orientation was oblique axial, and slices  
362 were aligned with the anterior/posterior commissures, and scanned in interleaved order with TE  
363 = 30 ms, TR = 2 s, flip angle = 80°.

364 Finally, ASL was collected using a field of view = 24 cm, matrix size = 128 x 128,  
365 bandwidth of 62.50 kHz; slice thickness = 4 mm. The acquisition orientation was axial aligned



366 with the anterior/posterior commissures. The 40 slices with 2 mm inter-slice spacing were acquired  
367 from inferior to superior in an interleaved order to cover most of the cortex with a TR = 4 s.

368

### 369 *Data processing and statistical analyses*

370 In the visuospatial task, trials with response time (RT) < 250 ms or > 2.5 s were excluded  
371 prior to statistical analyses (Ratcliff, 1993). Then, PAS responses between LS and MS during  
372 conscious or non-conscious trials were compared using repeated-measure two-way analysis of  
373 variance (ANOVA). Afterwards, only trials in absent (LS:  $87.6 \pm 15.9$  %; MS:  $87.5 \pm 14.7$  % of  
374 trials) and non-conscious (LS:  $81.3 \pm 18.1$  %; MS:  $85.1 \pm 18.7$  % of trials) conditions with PAS =  
375 1, and trials with PAS = 3 in conscious (LS:  $97.5 \pm 3.0$  %; MS:  $94.3 \pm 7.0$  %) condition were  
376 included in the analyses.

377 For the accuracy analyses, a hit was defined as a position match between disc location and  
378 probe together with a “yes” response, while a “no” response was defined as a miss. False alarm  
379 (FA) was considered as a non-match between disc location and probe with a “yes” response, while  
380 a “no” response defined a correct rejection (CR). Accuracy was defined as the proportion of correct  
381 answers (hits-FA) for conscious and non-conscious trials.

382 Accuracy, under the two sedation levels, was compared using Wilcoxon’s matched pairs  
383 test in conscious and in non-conscious conditions. RT differences between the two sedation levels  
384 were assessed using repeated-measure two-way ANOVA across the three visual presentation  
385 conditions. Specific differences for RT in MS and in LS between non-conscious and absent  
386 conditions were evaluated using Student’s t-tests.

387 For the metronome task, the three first trials of each sequence and missed responses were  
388 discarded from analysis to include only trials where participants were synchronized to the stimulus.

389 Visual-to-tap asynchrony was calculated as the absolute time difference between stimulus onset  
390 and participant's response. In other words, the smaller the difference, the better the performance.  
391 Then, variability in asynchrony was calculated for each sequence and each participant. Changes in  
392 variability due to Propofol sedation were estimated with the slope of a linear regression across the  
393 12 sequences, and were used as a sedation-effect estimation. A positive slope (increased  
394 variability) with increased Propofol reflected a decrease in arousal and vice versa. To assess  
395 changes in the sedation effect over the three stabilization periods at the group level, the sign of the  
396 slopes related to participants who started the experiment with MS was switched, respectively for  
397 each stabilization period. Group level comparison was done using repeated-measure one-way  
398 ANOVA.

399 All post hoc tests with correction for multiple comparisons were conducted using Newman-  
400 Keuls test and  $p$ -value  $< 0.05$  was considered significant.

401

#### 402 *fMRI analyses*

403 Image pre-processing, statistical fMRI, and ASL data analyses were conducted with  
404 SPM12 (Wellcome Department of Imaging Neuroscience, London, UK) running in Matlab 8.4  
405 (Mathworks, Inc., Sherbon, MA, USA) using custom-made Matlab scripts. Functional images  
406 were (i) slice-time corrected, (ii) realigned to the first image of the time series to correct for head  
407 movement, (iii) unwarped to remove residual movement-related variance (Andersson et al., 2001),  
408 and (iv) co-registered to high-resolution structural data. Structural images were normalized to the  
409 MNI (Montreal Neurological Institute) template using DARTEL (Ashburner, 2007) and resulting  
410 parameters were used for functional images normalization, which were resampled to 2-mm  
411 isotropic voxel size. Finally, functional images were smoothed with an 8-mm and a 2-mm FWHM

412 Gaussian kernel for univariate and multivariate pattern analysis (MVPA) (Gardumi et al., 2016)  
413 respectively.

414

#### 415 *Univariate analysis*

416 Pre-processed data were analyzed using a two-stage summary statistics random effect  
417 model (Friston et al., 1995; Holmes and Friston, 1998). At the first stage, task-dependent changes  
418 in BOLD signal were modeled as zero-duration event regressors time-locked to (i) the Mondrians'  
419 onsets for the visuospatial task, including conscious, non-conscious and absent conditions for each  
420 Propofol level and each PAS rating, and to (ii) the stimulus' onsets for the visual metronome task,  
421 including the four stimulus' positions. These regressors were convolved with the SPM12 canonical  
422 hemodynamic response function and entered into general linear model (GLM). The models also  
423 included constant terms, 6 head movement parameters, nuisance regressors such as missed  
424 responses, and physiological noise (6 parameters) from white matter and cerebrospinal fluid,  
425 estimated using aCompCor method (Behzadi et al., 2007). Finally, high-pass filter (cut-off = 128  
426 s) was applied to remove low-frequency drifts in the data.

427 Contrast maps were computed on beta maps resulting from the estimated first-level GLMs  
428 to reveal for conscious and non-conscious conditions, brain regions (i) subtending visuospatial  
429 processing regardless of sedation levels and (ii) presenting differences between sedation levels.  
430 Individuals' maps subtending conscious and non-conscious visuospatial networks were taken to  
431 second-level random-effects analyses (one-sample t-tests) to account for inter-individual  
432 variability. Comparison between sedation levels was done using paired t-tests for conscious and  
433 non-conscious conditions.

434 For the ASL data, the mean CBF value for gray matter for both sedation levels was  
435 calculated using histogram-based segmentation algorithm of the upper brain CBF values, based on  
436 the ASL sequences. Averaged difference images were converted to mL/100g/min using a single-  
437 compartment model. CBF images were (i) co-registered to high-resolution structural data, (ii)  
438 motion-corrected using a 6-parameters rigid body spatial transformation, and (iii) normalized to  
439 the MNI via DARTEL template image. CBF images for each participant were taken to second-  
440 level random-effects analyses (paired t-tests) to estimate CBF differences as a function of Propofol  
441 level.

442 Multiple comparisons correction of statistical maps at the second level was conducted on  
443 the whole brain using cluster-based extent thresholding of  $p < 0.05$  (FWE corrected) calculated  
444 based on the Gaussian random field method and following cluster-defining threshold of  $p < 0.001$ .

445

#### 446 *MVPA: Defining regions of interest*

447 Two searchlight MVPAs were conducted, for conscious and for non-conscious trials, to  
448 identify regions of interest (ROIs) where the mere presence of the stimulus could be decoded  
449 irrespective of sedation level (conscious *vs.* absent and non-conscious *vs.* absent). A searchlight  
450 decoding approach was used (Grootswagers et al., 2017; Haynes, 2015; Kriegeskorte et al., 2006;  
451 Pereira et al., 2009) as implemented in CoSMoMVPA decoding toolbox (Oosterhof et al., 2016),  
452 on the 2-mm smoothed beta parameter maps from the GLM described above (one map per trial).  
453 The number of maps/trials were balanced for each participant across conditions (Mumford et  
454 al., 2012). Then, a spherical searchlight (~300 voxels) was used to extract local features for  
455 classification, and was moved across the search space. To specifically identify regions subtending  
456 visuospatial perception, the search space was limited to probabilistic maps of visual topography

457 (Wang et al., 2015). A linear discriminant analysis (LDA) classifier was used, combined with a  
458 10-fold cross-validation procedure (Varoquaux et al., 2017). Within-run cross-validation has been  
459 shown to be unbiased for randomized event-related designs, as used here (Mumford et al., 2014).  
460 Nevertheless, to ensure that BOLD signal was non-overlapping between validation folds, we  
461 included only trials such that there was at least 30 s between the training and the testing fold.  
462 Individual maps of classification accuracies were thresholded at 50% (chance level) and smoothed  
463 with an 8-mm FWHM Gaussian kernel.

464 To ensure that the decoding of Propofol effects for conscious and non-conscious trials  
465 would be comparable and not confounded by regional differences, the ROI was defined such that  
466 both conscious and non-conscious processing was assuredly present within the ROI for each  
467 individual. That is, the overlap between the above-described searchlights was selected as ROI for  
468 each individual (ROI range size = 1168-2487 voxels). Importantly, the ROI-defining comparisons  
469 of conscious/non-conscious vs. absent are orthogonal to the latter comparisons of sedation levels  
470 (Kriegeskorte et al., 2009). Nevertheless, to verify that the above procedure for defining ROIs did  
471 not affect the latter classification of sedation levels, a third searchlight MVPA, using the  
472 metronome task data, was performed identifying again ROI of visuospatial processing.  
473 Specifically, the stimulus' position was decoded (left vs. right). For comparison with the original  
474 ROIs, the same number of voxels, for each individual, was used in these alternative ROI analyses.

475

#### 476 *MVPA: Decoding Propofol sedation*

477 To quantify the sedation effect (in terms of decoding accuracy) specifically related to  
478 conscious and to non-conscious visuospatial processing, we first analyzed it in relation to a  
479 common baseline – the absent conditions, using a contrast on a trial-by-trial basis. Thus, beta maps

480 from the absent conditions were subtracted from conscious (ConscLS-AbsLS and ConscMS-  
481 AbsMS) and from non-conscious (NonconscLS-AbsLS and NonconscMS-AbsMS) beta maps  
482 separately for each sedation level. To retain power although there were fewer absent trials than  
483 conscious/non-conscious trials, absent beta maps were randomly selected within each block such  
484 that the same beta map of the absent condition could be used no more than three times to be  
485 subtracted from conscious or from non-conscious beta maps. This level-specific subtracting  
486 procedure controls for non-specific effects from Propofol (e.g., subtle changes in CBF) and for  
487 effects unrelated to visuospatial processing.

488 Arguably, conscious perceptual experiences are preceded by non-conscious processing  
489 (Aru et al., 2019). Thus, to ensure that the sedation level decoding in the conscious condition was  
490 specifically related to conscious experiences, a second procedure of subtracting level-specific non-  
491 conscious beta maps was performed. Here, non-conscious beta maps were subtracted from  
492 conscious beta maps for LS and MS separately (ConscLS-NC and ConscMS-NC). Because there  
493 were more non-conscious than conscious trials, the surplus non-conscious trials were randomly  
494 selected for exclusion within each block.

495 Three ROI-based MVPAs, using the ROIs described above, were thus performed to decode  
496 the sedation level: (i) ConscLS-AbsLS *vs.* ConscMS-AbsMS, (ii) NonconscLS-AbsLS *vs.*  
497 NonconscMS-AbsMS, and (iii) ConscLS-NCLS *vs.* ConscMS-NCLS. Classification of Propofol  
498 levels was performed on a balanced number of beta maps/trials for each participant across  
499 conscious/non-conscious conditions and across the two sedations levels, thereby ensuring that  
500 decoding accuracy would be comparable and not confounded by the number of trials used in the  
501 classification. A LDA classifier and 10-fold cross-validation with at least 30 s between the testing  
502 and the training folds was used.

503 Individual accuracy values were entered into second-level analyses, using first a two-step  
504 permutation procedure (Stelzer et al., 2013) to evaluate if classification at the group level was  
505 significantly above chance level. Finally, to evaluate whether MS affected non-conscious and  
506 conscious processing differently, differences in decoding accuracy between conscious and non-  
507 conscious were assessed using Wilcoxon's matched pairs test. A p-value < 0.05 was considered  
508 significant.

509

510

511 **Acknowledgments:** We thank Göran Westling for engineering support, Anders Lundquist for  
512 statistical advice, Anders Wåhlin for support with the analysis of ASL data, and Stefan Lehtipalo  
513 and Johan Söderberg for support during pilot studies. We also thank George Northoff, Christof  
514 Koch, and Lars Nyberg for comments on previous versions of the manuscript, and all staff at UFBI  
515 for their contribution. This study was supported by Riksbankens Jubileumsfond (Swedish  
516 foundation for humanities and social sciences; Grant: P17-0772:1). FB was supported by Fundação  
517 para a Ciência e Tecnologia (CEECIND/03661/2017).

518 **Competing interests:** The authors declare that they have no competing interests.

519

## 520 **References**

521

522 Ahrens M. 2013. Multivariate Pattern Analysis of fMRI Data for Functional Voice Localizer.

523 *Neuroimage* **62**:852–855. doi:10.1016/j.neuroimage.2012.03.016.Multivariate

524 Andersson JLR, Hutton C, Ashburner J, Turner R, Friston K. 2001. Modeling geometric

525 deformations in EPI time series. *Neuroimage* **13**:903–919. doi:10.1006/nimg.2001.0746

- 526 Aru J, Suzuki M, Larkum ME. 2020. Cellular Mechanisms of Conscious Processing. *Trends*  
527 *Cogn Sci* **xx**:1–12. doi:10.1016/j.tics.2020.07.006
- 528 Aru J, Suzuki M, Rutiku R, Larkum ME, Bachmann T. 2019. Coupling the State and Contents of  
529 Consciousness. *Front Syst Neurosci* **13**:1–9. doi:10.3389/fnsys.2019.00043
- 530 Ashburner J. 2007. A fast diffeomorphic image registration algorithm. *Neuroimage* **38**:95–113.  
531 doi:10.1016/j.neuroimage.2007.07.007
- 532 Bachmann T. 2012. How to begin to overcome the ambiguity present in differentiation between  
533 contents and levels of consciousness? *Front Psychol* **3**:1–6. doi:10.3389/fpsyg.2012.00082
- 534 Bachmann T, Hudetz AG. 2014. It is time to combine the two main traditions in the research on  
535 the neural correlates of consciousness: C=LxD. *Front Psychol* **5**:1–13.  
536 doi:10.3389/fpsyg.2014.00940
- 537 Bayne T, Hohwy J, Owen AM. 2016. Are There Levels of Consciousness? *Trends Cogn Sci*  
538 **20**:405–413. doi:10.1016/j.tics.2016.03.009
- 539 Behzadi Y, Restom K, Liao J, Liu TT. 2007. A component based noise correction method  
540 (CompCor) for BOLD and perfusion based fMRI. *Neuroimage* **37**:90–101.  
541 doi:10.1016/j.neuroimage.2007.04.042
- 542 Bergström F, Eriksson J. 2018. Neural evidence for non-conscious working memory. *Cereb*  
543 *Cortex* **28**:3217–3228. doi:10.1093/cercor/bhx193
- 544 Casali AG, Gosseries O, Rosanova M, Boly M, Sarasso S, Casali KR, Casarotto S, Bruno MA,  
545 Laureys S, Tononi G, Massimini M. 2013. A theoretically based index of consciousness  
546 independent of sensory processing and behavior. *Sci Transl Med* **5**:198ra105.  
547 doi:10.1126/scitranslmed.3006294
- 548 Coull JT, Jones MEP, Egan TD, Frith CD, Maze M. 2004. Attentional effects of noradrenaline



- 549 vary with arousal level: Selective activation of thalamic pulvinar in humans. *Neuroimage*  
550 **22**:315–322. doi:10.1016/j.neuroimage.2003.12.022
- 551 De Schotten MT, Urbanski M, Duffau H, Volle E, Lévy R, Dubois B, Bartolomeo P. 2005.  
552 Neuroscience: Direct evidence for a parietal-frontal pathway subserving spatial awareness  
553 in humans. *Science (80- )* **309**:2226–2228. doi:10.1126/science.1116251
- 554 Demertzi A, Tagliazucchi E, Dehaene S, Deco G, Barttfeld P, Raimondo F, Martial C,  
555 Fernández-Espejo D, Rohaut B, Voss HU, Schiff ND, Owen AM, Laureys S, Naccache L,  
556 Sitt JD. 2019. Human consciousness is supported by dynamic complex patterns of brain  
557 signal coordination. *Sci Adv* **5**:1–12. doi:10.1126/sciadv.aat7603
- 558 Eriksson J, Fontan A, Pedale T. 2020. Make the Unconscious Explicit to Boost the Science of  
559 Consciousness. *Front Psychol* **11**:1–4. doi:10.3389/fpsyg.2020.00260
- 560 Errando CL, Sigl JC, Robles M, Calabuig E, García J, Arocas F, Higuera R, Del Rosario E,  
561 López D, Peiró CM, Soriano JL, Chaves S, Gil F, García-Aguado R. 2008. Awareness with  
562 recall during general anaesthesia: A prospective observational evaluation of 4001 patients.  
563 *Br J Anaesth* **101**:178–185. doi:10.1093/bja/aen144
- 564 Fazekas P, Overgaard M. 2016. Multidimensional Models of Degrees and Levels of  
565 Consciousness. *Trends Cogn Sci* **20**:715–716. doi:10.1016/j.tics.2016.06.011
- 566 Friston KJ, Holmes AP, Poline JB, Grasby PJ, Williams SCR, Frackowiak RSJ, Turner R. 1995.  
567 Analysis of fMRI time-series revisited. *Neuroimage*. doi:10.1006/nimg.1995.1007
- 568 Gardumi A, Ivanov D, Hausfeld L, Valente G, Formisano E, Uludağ K. 2016. The effect of  
569 spatial resolution on decoding accuracy in fMRI multivariate pattern analysis. *Neuroimage*  
570 **132**:32–42. doi:10.1016/j.neuroimage.2016.02.033
- 571 Grootswagers T, Wardle SG, Carlson TA. 2017. Decoding dynamic brain patterns from evoked

- 572 responses: A tutorial on multivariate pattern analysis applied to time series neuroimaging  
573 data. *J Cogn Neurosci* **29**:677–697. doi:10.1162/jocn\_a\_01068
- 574 Haxby J V. 2012. Multivariate pattern analysis of fMRI: The early beginnings. *Neuroimage*  
575 **62**:852–855. doi:10.1016/j.neuroimage.2012.03.016
- 576 Haynes JD. 2015. A Primer on Pattern-Based Approaches to fMRI: Principles, Pitfalls, and  
577 Perspectives. *Neuron* **87**:257–270. doi:10.1016/j.neuron.2015.05.025
- 578 Hohwy J. 2009. The neural correlates of consciousness: New experimental approaches needed?  
579 *Conscious Cogn* **18**:428–438. doi:10.1016/j.concog.2009.02.006
- 580 Holmes AP, Friston KJ. 1998. Generalisability, random effects & population inference.  
581 *Neuroimage* **7**:54–57. doi:10.1016/s1053-8119(18)31587-8
- 582 Hudetz AG, Mashour GA. 2016. Disconnecting Consciousness: Is There a Common Anesthetic  
583 End Point? *Anesth Analg* **123**:1228–1240. doi:10.1213/ANE.0000000000001353
- 584 Johnston AJ, Steiner LA, Chatfield DA, Coleman MR, Coles JP, Al-Rawi PG, Menon DK,  
585 Gupta AK. 2003. Effects of propofol on cerebral oxygenation and metabolism after head  
586 injury. *Br J Anaesth* **91**:781–786. doi:10.1093/bja/aeg256
- 587 Kihlstrom JF. 1987. Unconscious The Information-Processing Perspective. *Science (80- )*  
588 **237**:1445–1452.
- 589 Koch C, Massimini M, Boly M, Tononi G. 2016. Neural correlates of consciousness: Progress  
590 and problems. *Nat Rev Neurosci* **17**:307–321. doi:10.1038/nrn.2016.22
- 591 Kriegeskorte N, Goebel R, Bandettini P. 2006. Information-based functional brain mapping.  
592 *Proc Natl Acad Sci U S A* **103**:3863–3868. doi:10.1073/pnas.0600244103
- 593 Kriegeskorte N, Simmons WK, Bellgowan PSF, Baker CI. 2009. Circular analysis in systems  
594 neuroscience – the dangers of double dipping. *Nat Neurosci* **12**:535–540.

- 595           doi:10.1038/nn.2303.Circular
- 596   Laureys S. 2005. The neural correlate of (un)awareness: Lessons from the vegetative state.  
597           *Trends Cogn Sci* **9**:556–559. doi:10.1016/j.tics.2005.10.010
- 598   Mashour GA, Hudetz AG. 2017. Bottom-up and top-down mechanisms of general anesthetics  
599           modulate different dimensions of consciousness. *Front Neural Circuits* **11**:1–6.  
600           doi:10.3389/fncir.2017.00044
- 601   Mumford JA, Davis T, Poldrack RA. 2014. The impact of study design on pattern estimation for  
602           single-trial multivariate pattern analysis. *Neuroimage* **103**:130–138.  
603           doi:10.1016/j.neuroimage.2014.09.026
- 604   Mumford JA, Turner BO, Ashby FG, Poldrack RA. 2012. Deconvolving BOLD activation in  
605           event-related designs for multivoxel pattern classification analyses. *Neuroimage* **59**:2636–  
606           2643. doi:10.1016/j.neuroimage.2011.08.076
- 607   Nagel T. 1974. What Is It Like to Be a Bat? *Philos Rev* **83**:435–450.  
608           doi:10.4159/harvard.9780674594623.c15
- 609   Northoff G, Huang Z. 2017. How do the brain’s time and space mediate consciousness and its  
610           different dimensions? Temporo-spatial theory of consciousness (TTC). *Neurosci Biobehav*  
611           *Rev* **80**:630–645. doi:10.1016/j.neubiorev.2017.07.013
- 612   O’Shea SM, Wong LC, Harrison NL. 2000. Propofol increases agonist efficacy at the GABA(A)  
613           receptor. *Brain Res* **852**:344–348. doi:10.1016/S0006-8993(99)02151-4
- 614   Oosterhof NN, Connolly AC, Haxby J V. 2016. CoSMoMVPA: Multi-modal multivariate  
615           pattern analysis of neuroimaging data in matlab/GNU octave. *Front Neuroinform* **10**:27.  
616           doi:10.3389/fninf.2016.00027
- 617   Overgaard M, Rote J, Mouridsen K, Ramsøy TZ. 2006. Is conscious perception gradual or

- 618 dichotomous? A comparison of report methodologies during a visual task. *Conscious Cogn*  
619 **15**:700–708. doi:10.1016/j.concog.2006.04.002
- 620 Pereira F, Mitchell T, Botvinick M. 2009. Machine learning classifiers and fMRI: a tutorial  
621 overview. *Neuroimage* **45**:S199–S209. doi:10.1016/j.neuroimage.2008.11.007
- 622 Phillips WA, Bachmann T, Storm JF. 2018. Apical Function in Neocortical Pyramidal Cells: A  
623 Common Pathway by Which General Anesthetics Can Affect Mental State. *Front Neural*  
624 *Circuits* **12**:1–15. doi:10.3389/fncir.2018.00050
- 625 Qiu M, Scheinost D, Ramani R, Constable RT. 2017. Multi-modal analysis of functional  
626 connectivity and cerebral blood flow reveals shared and unique effects of propofol in large-  
627 scale brain networks. *Neuroimage* **148**:130–140. doi:10.1016/j.neuroimage.2016.12.080
- 628 Ratcliff R. 1993. Methods for dealing with response time outliers. *Psychol Bull* **114**:510–532.
- 629 Sandberg K, Andersen LM, Overgaard M. 2014. Using multivariate decoding to go beyond  
630 contrastive analyses in consciousness research. *Front Psychol* **5**:1–6.  
631 doi:10.3389/fpsyg.2014.01250
- 632 Sarasso S, Boly M, Napolitani M, Gosseries O, Charland-Verville V, Casarotto S, Rosanova M,  
633 Casali AG, Brichant JF, Boveroux P, Rex S, Tononi G, Laureys S, Massimini M. 2015.  
634 Consciousness and complexity during unresponsiveness induced by propofol, xenon, and  
635 ketamine. *Curr Biol* **25**:3099–3105. doi:10.1016/j.cub.2015.10.014
- 636 Schrouff J, Perlberg V, Boly M, Marrelec G, Boveroux P, Vanhaudenhuyse A, Bruno MA,  
637 Laureys S, Phillips C, Péligrini-Issac M, Maquet P, Benali H. 2011. Brain functional  
638 integration decreases during propofol-induced loss of consciousness. *Neuroimage* **57**:198–  
639 205. doi:10.1016/j.neuroimage.2011.04.020
- 640 Searle JR. 2000. Consciousness. *Annu Rev Neurosci* **23**:557–578.

- 641 Sheikh UA, Carreiras M, Soto D. 2019. Decoding the meaning of unconsciously processed  
642 words using fMRI-based MVPA. *Neuroimage* **191**:430–440.  
643 doi:10.1016/j.neuroimage.2019.02.010
- 644 Soto D, Sheikh UA, Rosenthal CR. 2019. A Novel Framework for Unconscious Processing.  
645 *Trends Cogn Sci* **23**:372–376. doi:10.1016/j.tics.2019.03.002
- 646 Stelzer J, Chen Y, Turner R. 2013. Statistical inference and multiple testing correction in  
647 classification-based multi-voxel pattern analysis (MVPA): Random permutations and  
648 cluster size control. *Neuroimage* **65**:69–82. doi:10.1016/j.neuroimage.2012.09.063
- 649 Suzuki M, Larkum ME. 2020. General Anesthesia Decouples Cortical Pyramidal Neurons. *Cell*  
650 **180**:666-676.e13. doi:10.1016/j.cell.2020.01.024
- 651 Tononi G, Boly M, Massimini M, Koch C. 2016. Integrated information theory: From  
652 consciousness to its physical substrate. *Nat Rev Neurosci* **17**:450–461.  
653 doi:10.1038/nrn.2016.44
- 654 Trapani G, Altomare C, Sanna E, Biggio G, Liso G. 2012. Propofol in Anesthesia. Mechanism of  
655 Action, Structure-Activity Relationships, and Drug Delivery. *Curr Med Chem* **7**:249–271.  
656 doi:10.2174/0929867003375335
- 657 Tsuchiya N, Koch C. 2005. Continuous flash suppression reduces negative afterimages. *Nat*  
658 *Neurosci* **8**:1096–1101. doi:10.1038/nn1500
- 659 Varoquaux G, Raamana PR, Engemann DA, Hoyos-Idrobo A, Schwartz Y, Thirion B. 2017.  
660 Assessing and tuning brain decoders: Cross-validation, caveats, and guidelines. *Neuroimage*  
661 **145**:166–179. doi:10.1016/j.neuroimage.2016.10.038
- 662 Veselis RA, Feshchenko VA, Reinsel RA, Beattie B, Akhurst TJ. 2005. Propofol and thiopental  
663 do not interfere with regional cerebral blood flow response at sedative concentrations.

664 *Anesthesiology* **102**:26–34. doi:10.1097/00000542-200501000-00008

665 Wang L, Mruczek REB, Arcaro MJ, Kastner S. 2015. Probabilistic maps of visual topography in  
666 human cortex. *Cereb Cortex* **25**:3911–3931. doi:10.1093/cercor/bhu277

667 Wislowska M, Del Giudice R, Lechinger J, Wielek T, Heib DPJ, Pitiot A, Pichler G, Michitsch  
668 G, Donis J, Schabus M. 2017. Night and day variations of sleep in patients with disorders of  
669 consciousness. *Sci Rep* **7**:1–11. doi:10.1038/s41598-017-00323-4

670

671

672

673

674

675

676

677

678

679

680

681

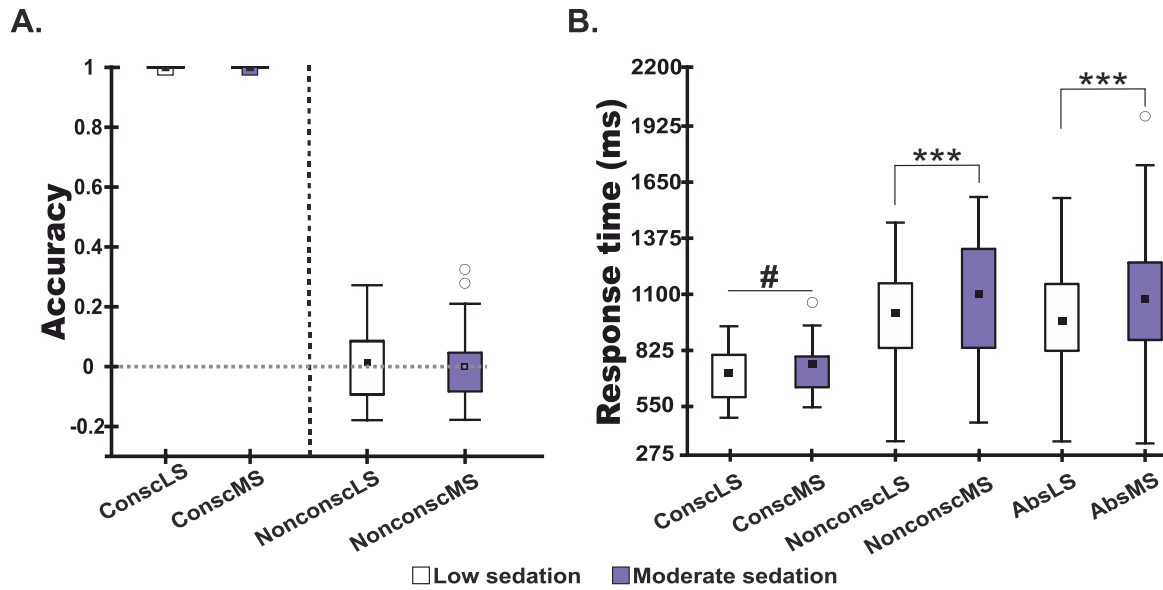

682

683 **Fig. 1: Behavioral performance during the visuospatial task under the two levels of sedation.**

684 **A.** Boxplots showing participants' accuracy (hits - false alarms) to detect the correct stimulus  
685 location during low (white) and moderate (purple) sedation; the gray dashed line indicates chance  
686 level. **B.** A global slowing in response time verified that participants' arousal was reduced with  
687 increased sedation. White circles indicate outliers; the difference was significant also without these  
688 data points. \*\*\* $p < 0.001$ ; #  $p = 0.06$ .

689

690

691

692

693

694

695

696

697

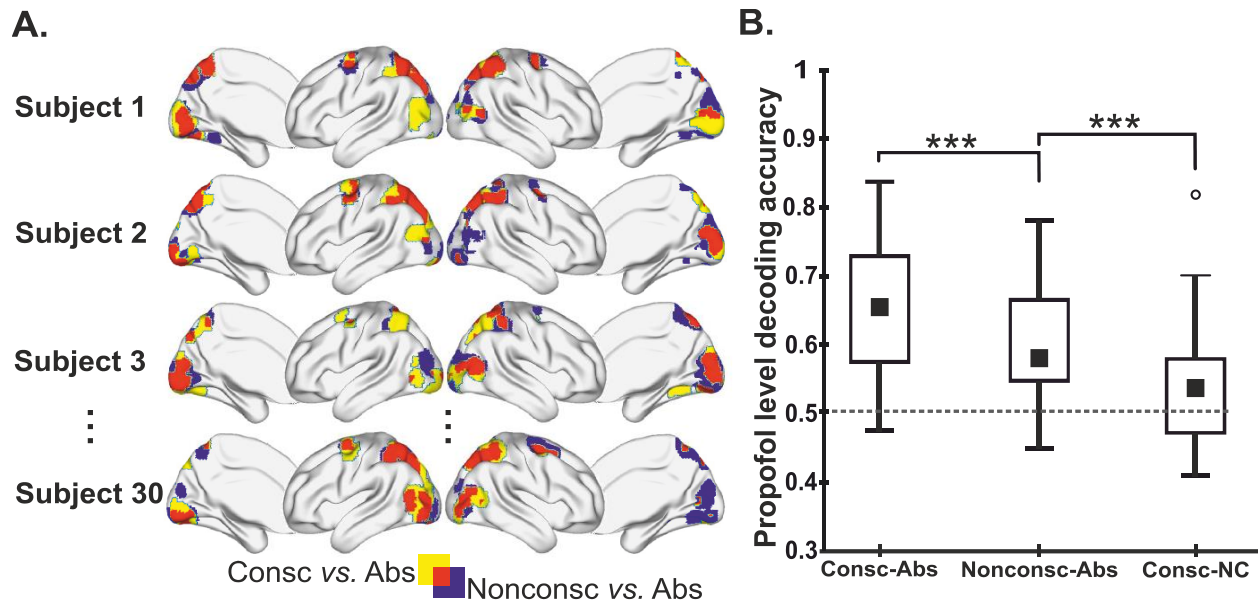

698

699 **Fig. 2: Effect of sedation on conscious and non-conscious visuospatial processing.**

700 **A.** Conscious (yellow) and non-conscious (blue) maps of MVPA searchlights, decoding presence  
701 vs. absence of the stimulus for each individual. Decoding of the sedation level was performed in a  
702 ROI defined as the overlap (red) between the two searchlight maps. **B.** Decoding accuracy for the  
703 sedation level classification (low vs. moderate), for conscious and non-conscious conditions  
704 controlled for unspecific sedation effects (-Abs), and for the conscious condition when controlling  
705 for non-conscious visuospatial processing (-NC). White circle indicates an outlier; the difference  
706 was significant also without this data points. Consc: Conscious; Nonconsc: non-conscious. \*\*\*p  
707 < 0.001.

708

709

710

711

712
